# Supplementary material for: Local anesthetic levobupivacaine inhibits stemness of osteosarcoma cells by epigenetically repressing MAFB though reducing KAT5 expression
Source: Aging (Albany NY). 2022 Mar 25;14(6):2793–804. doi: 10.18632/aging.203975 (PMC9004559; doi:10.18632/aging.203975)
Supplement: Supplementary Figures [file aging-14-203975-s001.pdf]

## SUPPLEMENTARY FIGURES

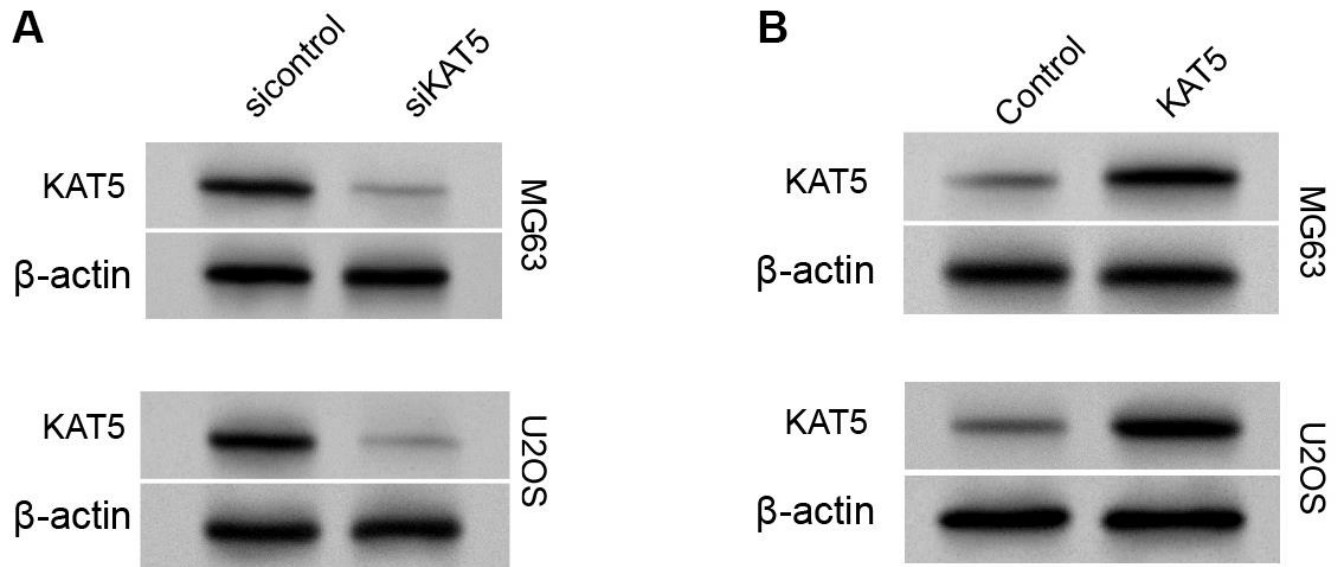

**Supplementary Figure 1. The validation of expression KAT5.** (A, B) The expression of KAT5 was measured by Western blot analysis in MG63 and U2OS cells treated as the indication.

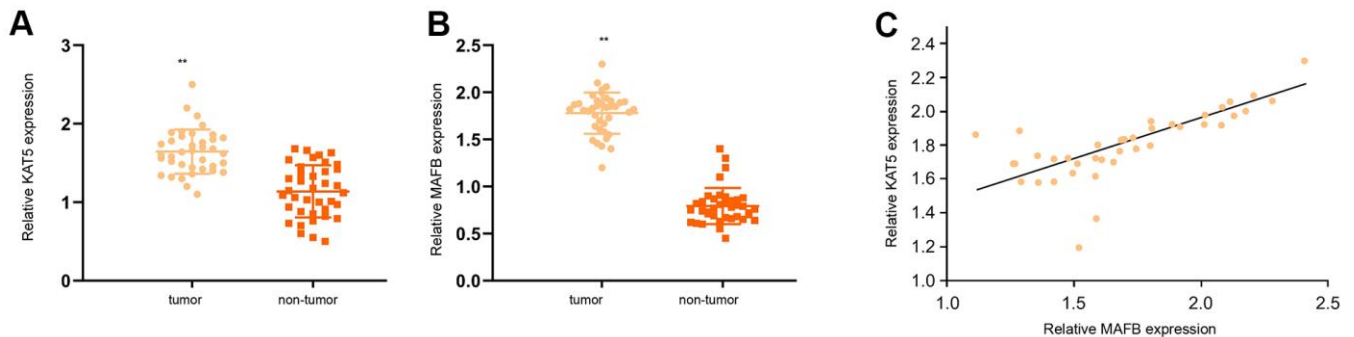

**Supplementary Figure 2. The expression of KAT5 and MAFB is enhanced in clinical osteosarcoma samples.** (A–C) The expression and correlation of MAFB and KAT5 was measured by qPCR in clinical osteosarcoma tissues (n=27). \*\*  $P < 0.01$ .
